# Supplementary material for: Molten salt synthesis of Na2Ti3O7 and Na2Ti6O13 one-dimensional nanostructures and their photocatalytic and humidity sensing properties
Source: Royal Society of Chemistry journal article supplement (doi:10.1039/c3ce27092k), 2013-01-01
Supplement: c3ce27092k.pdf [file c3ce27092k.pdf]

Electronic Supplementary Information for  
**Molten salt synthesis of  $\text{Na}_2\text{Ti}_3\text{O}_7$  and  $\text{Na}_2\text{Ti}_6\text{O}_{13}$  one-dimensional nanostructures and their photocatalytic and humidity sensing properties**

Cheng-Yan Xu,<sup>\*a,b,c</sup> Jia Wu,<sup>a</sup> Pei Zhang,<sup>a</sup> Sheng-Peng Hu,<sup>a</sup> Jian-Xun Cui,<sup>a</sup>  
Zeng-Quan Wang,<sup>a</sup> Yu-Dong Huang,<sup>b</sup> and Liang Zhen<sup>\*a,c</sup>

<sup>a</sup> School of Materials Science and Engineering, Harbin Institute of Technology, Harbin 150001, China.

<sup>b</sup> School of Chemical Engineering, Harbin Institute of Technology, Harbin 150001, China.

<sup>c</sup> MOE Key Laboratory of Micro-systems and Micro-structures Manufacturing, Harbin Institute of Technology, Harbin 150001, China

Contact: Fax: 86 451 8641 3922; Tel: 86 451 8641 2133; E-mail: cy\_xu@hit.edu.cn (C.Y. Xu); lzhen@hit.edu.cn (L. Zhen)

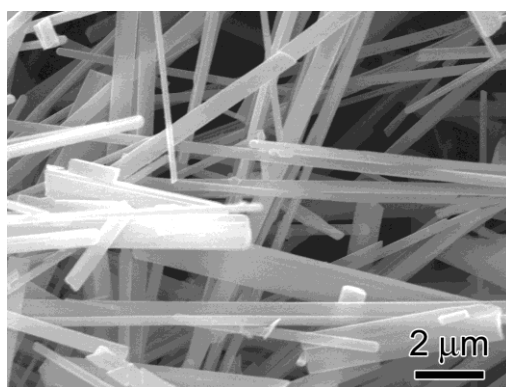

**Fig. S1.** SEM image of  $\text{Na}_2\text{Ti}_6\text{O}_{13}$  whiskers synthesized at 925 °C.

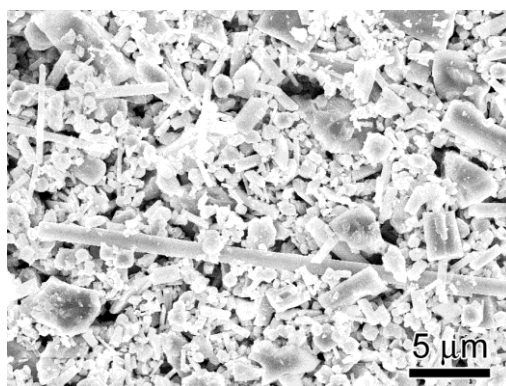

**Fig. S2.** SEM image of the product synthesized between  $\text{TiO}_2$  and  $\text{NaCl}$  at 1000 °C.

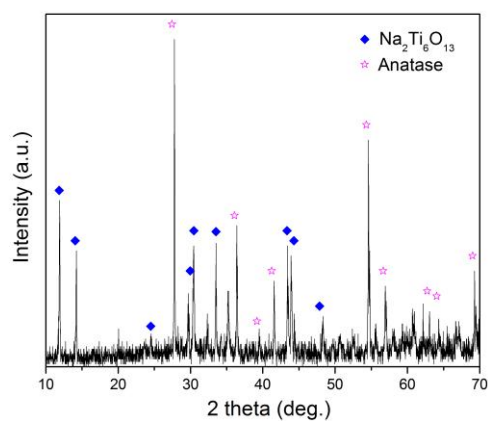

**Fig. S3.** XRD pattern of the product synthesized between  $\text{TiO}_2$  and  $\text{NaCl}$  at  $1000\text{ }^\circ\text{C}$ .

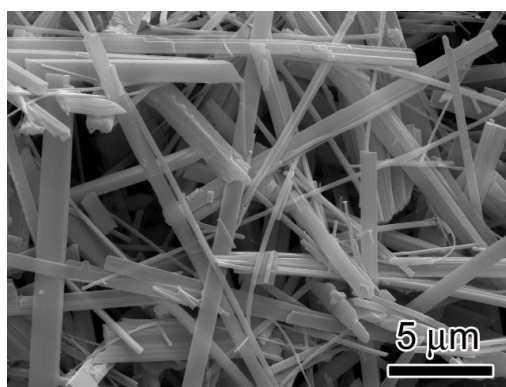

**Fig. S4.** SEM image of the product synthesized with  $\text{Na}_2\text{C}_2\text{O}_4/\text{TiO}_2$  molar ratio of 1 : 2 in the absence of surfactant NP-9.

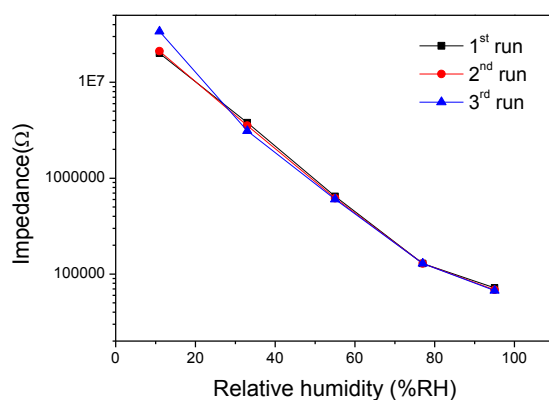

**Fig. S5.** Stability of  $\text{Na}_2\text{Ti}_3\text{O}_7$  nanowires-based humidity sensor measure at a frequency of 40 Hz.
